# Supplementary material for: The Fab portion of immunoglobulin G contributes to its binding to Fcγ receptor III
Source: PubMed Central journal article supplement (PMC6697678; doi:10.1038/s41598-019-48323-w), 2019-08-16
Supplement: 41598_2019_48323_MOESM7_ESM.pdf [file 41598_2019_48323_MOESM7_ESM.pdf]

## Supplementary information

### The Fab portion of immunoglobulin G contributes to its binding to Fcγ receptor III

Rina Yogo <sup>1,2</sup>, Yuki Yamaguchi <sup>3</sup>, Hiroki Watanabe <sup>1</sup>, Hirokazu Yagi <sup>2</sup>, Tadashi Satoh <sup>2</sup>, Mahito Nakanishi <sup>4</sup>, Masayoshi Onitsuka <sup>5</sup>, Takeshi Omasa <sup>3</sup>, Mari Shimada <sup>3</sup>, Takahiro Maruno <sup>3</sup>, Tetsuo Torisu <sup>3</sup>, Shio Watanabe <sup>6</sup>, Daisuke Higo <sup>6</sup>, Takayuki Uchihashi <sup>1,7</sup>, Saeko Yanaka <sup>1,2</sup>, Susumu Uchiyama <sup>1,3</sup>, and Koichi Kato <sup>1,2</sup>

<sup>1</sup> Exploratory Research Center on Life and Living Systems (ExCELLS), National Institutes of Natural Sciences, 5-1 Higashiyama, Myodaiji, Okazaki, 444-8787, Japan; yogo@ims.ac.jp, hwatanabe@ims.ac.jp, saeko-yanaka@ims.ac.jp, kkatonmr@ims.ac.jp

<sup>2</sup> Graduate School of Pharmaceutical Sciences, Nagoya City University, 3-1 Tanabe-dori, Mizuho-ku, Nagoya, Aichi, 467-8603, Japan; hyagi@phar.nagoya-cu.ac.jp, tadashisatoh@phar.nagoya-cu.ac.jp

<sup>3</sup> Graduate School of Engineering, Osaka University, 2-1 Yamadaoka, Suita, Osaka, 565-0871, Japan; yuki.yamaguchi@bio.eng.osaka-u.ac.jp, omasa@bio.eng.osaka-u.ac.jp, marihorn211@gmail.com, tmaruno@bio.eng.osaka-u.ac.jp, tetsuo.torisu@bio.eng.osaka-u.ac.jp, suchi@bio.eng.osaka-u.ac.jp

<sup>4</sup> Biotechnology Research Institute for Drug Discovery, National Institute of Advanced Industrial Science and Technology (AIST), 1-1-1 Higashi, Central 5, Tsukuba, Ibaraki, 305-8565, Japan; mahito-nakanishi@aist.go.jp

<sup>5</sup> Graduate School of Technology, Industrial and Social Sciences, Tokushima University, Minamijosanjima-cho 2-1, Tokushima, 770-8513, Japan. onitsuka@tokushima-u.ac.jp.

<sup>6</sup> Thermo Fisher Scientific, 3-9 Moriya-cho, Kanagawa-ku, Yokohama-shi, Kanagawa, 221-0022, Japan; daisuke.higo@thermofisher.com, shio.watanabe@thermofisher.com

<sup>7</sup> Department of Physics, Nagoya University, Chikusa-ku, Nagoya, Aichi, 464-8602, Japan; uchihast@d.phys.nagoya-u.ac.jp

## Supplementary Figures

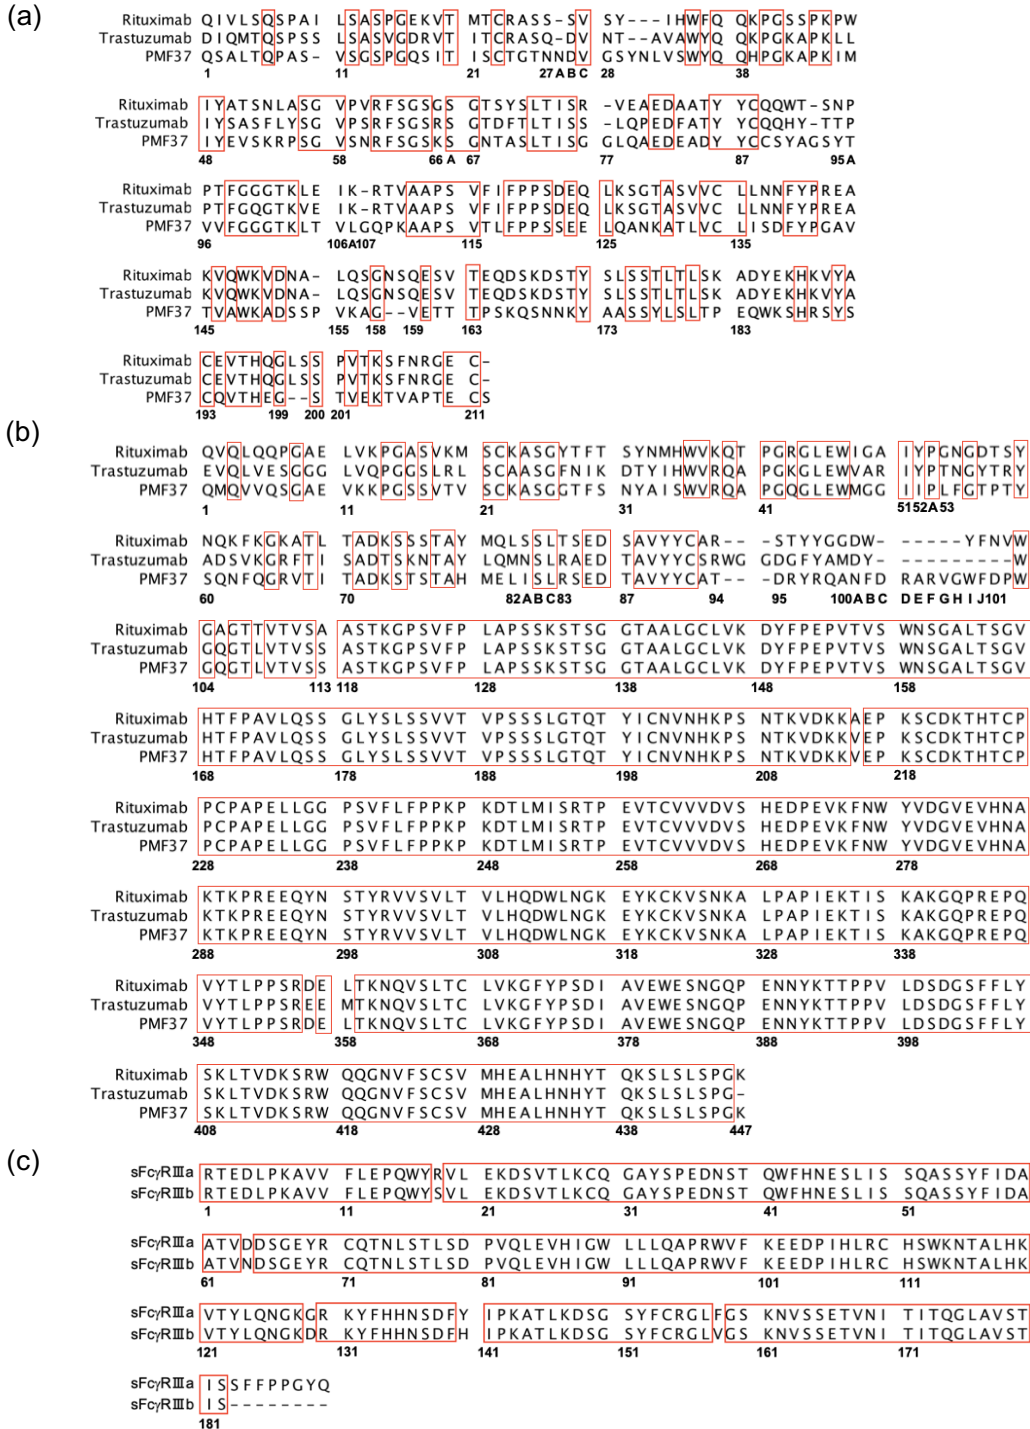

### Supplementary Figure 1

Sequence alignments of (a) the light chains and (b) the heavy chains of rituximab, trastuzumab, and PMF37 and (c) sFcγRIIIa and sFcγRIIIb. The numbering system used in the present study for the constant region is based on human myeloma protein Eu<sup>1</sup>. The convention of Kabat et al. (1987) has been followed for the numbering of the variable regions<sup>2</sup>. Conserved residues are boxed in red.

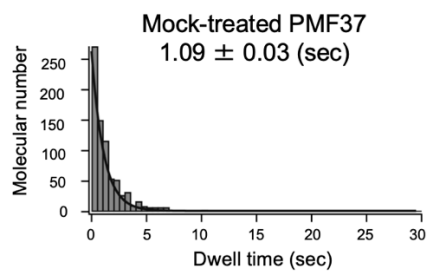

## Supplementary Figure 2

Dwell time of mock-treated PMF37 on sFc $\gamma$ RIIIa.

(a)

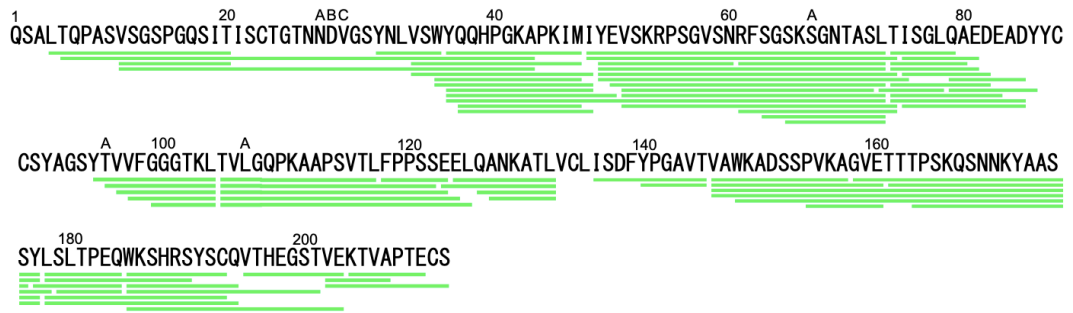

(b)

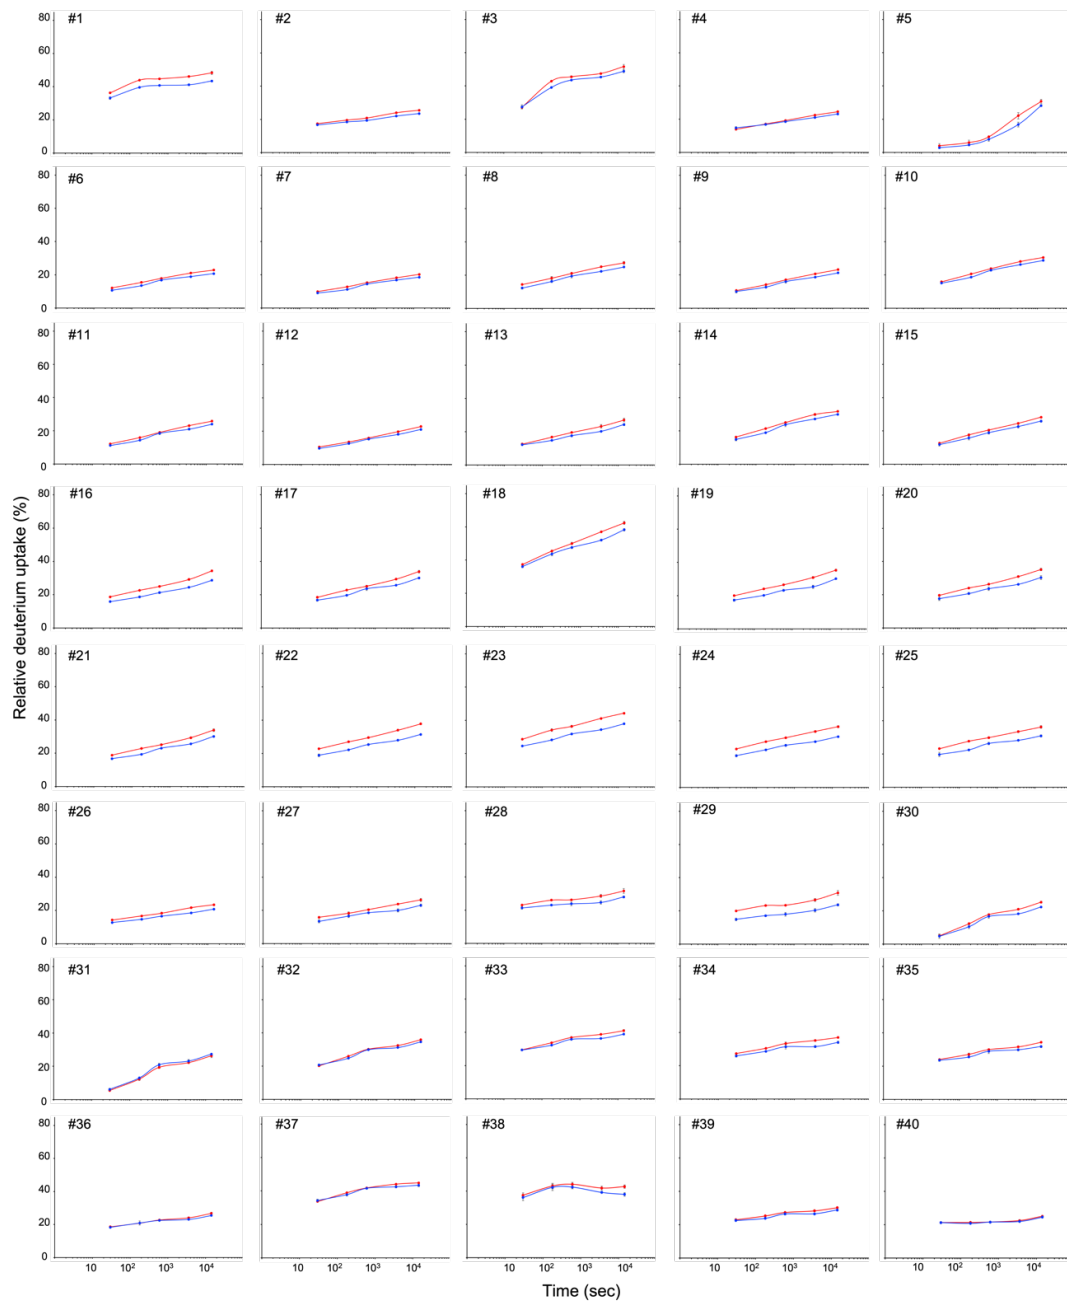

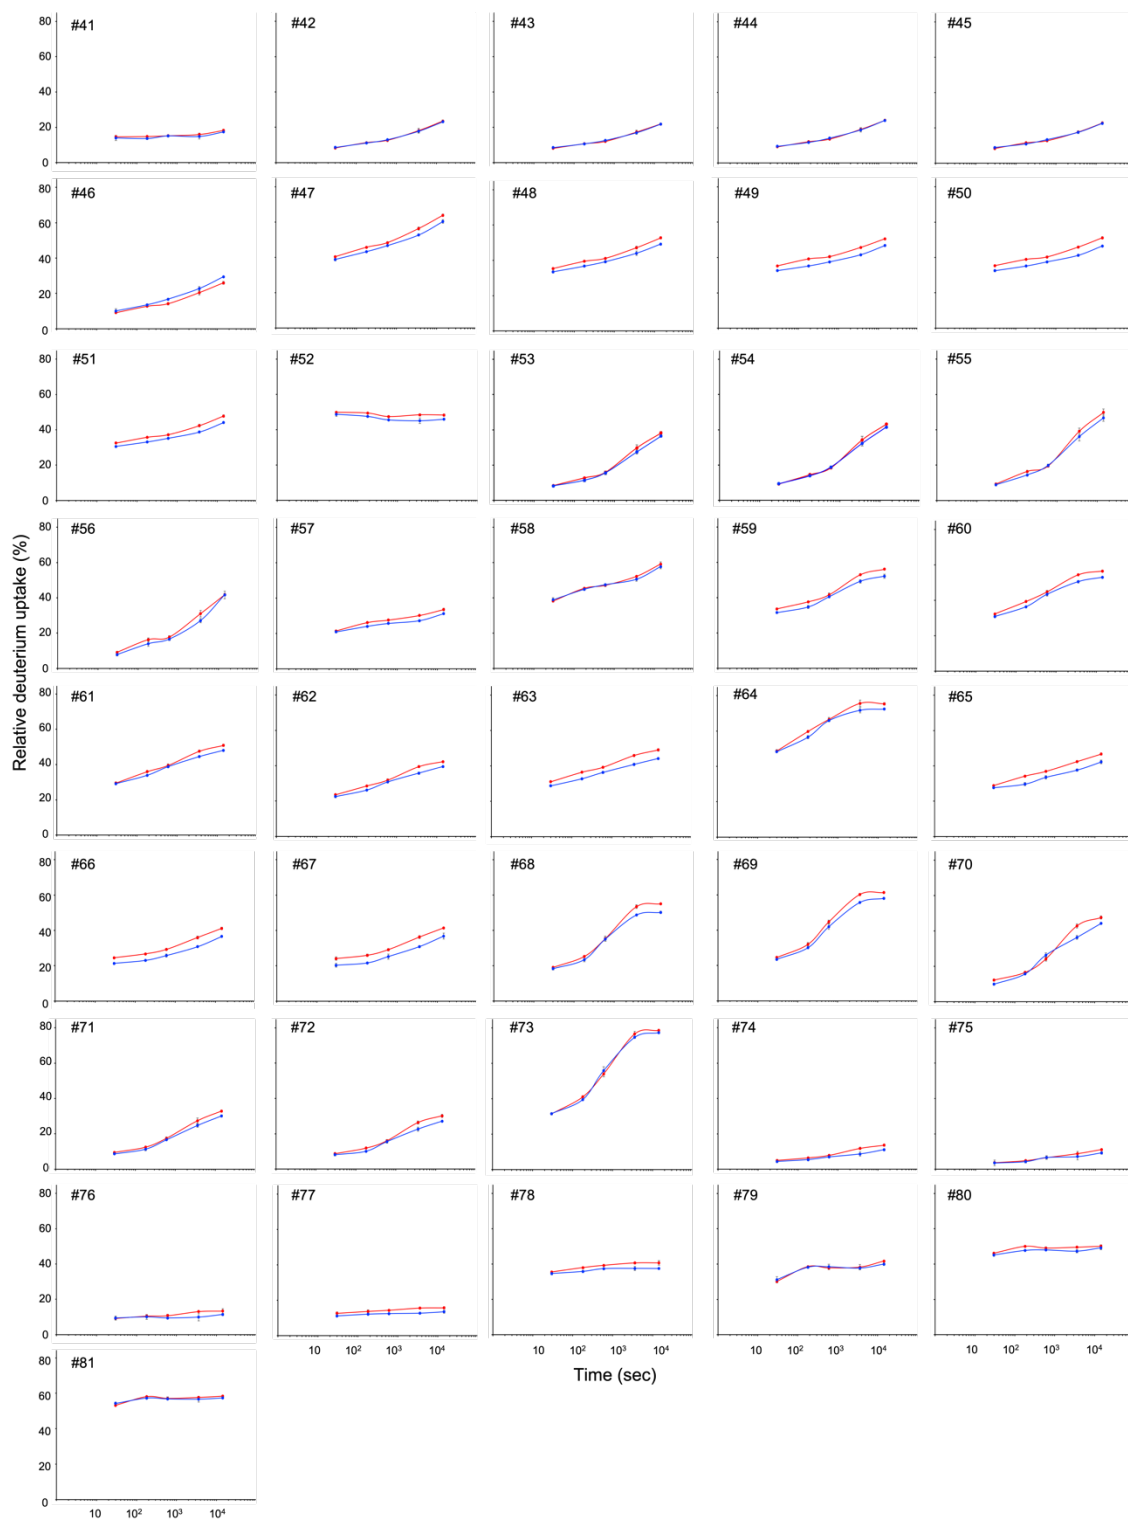

### Supplementary Figure 3

HDX-MS data of the light chain. (a) Coverage map of identified peptides and (b) time-dependent deuterium uptake graphs of all peptides used for deuterium uptake comparison between free (red) and complexed states (blue).

(a)

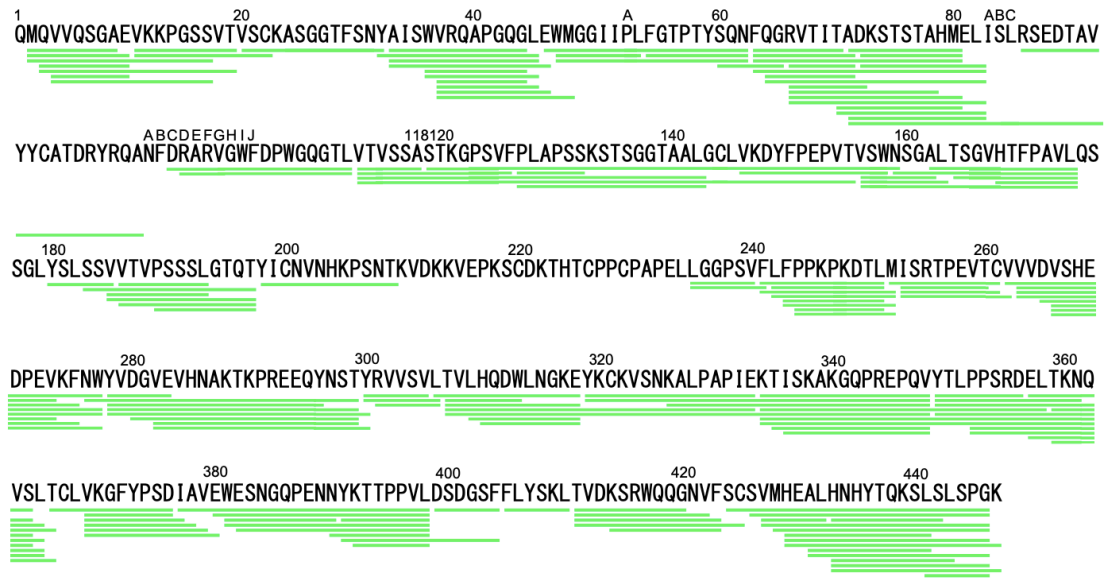

(b)

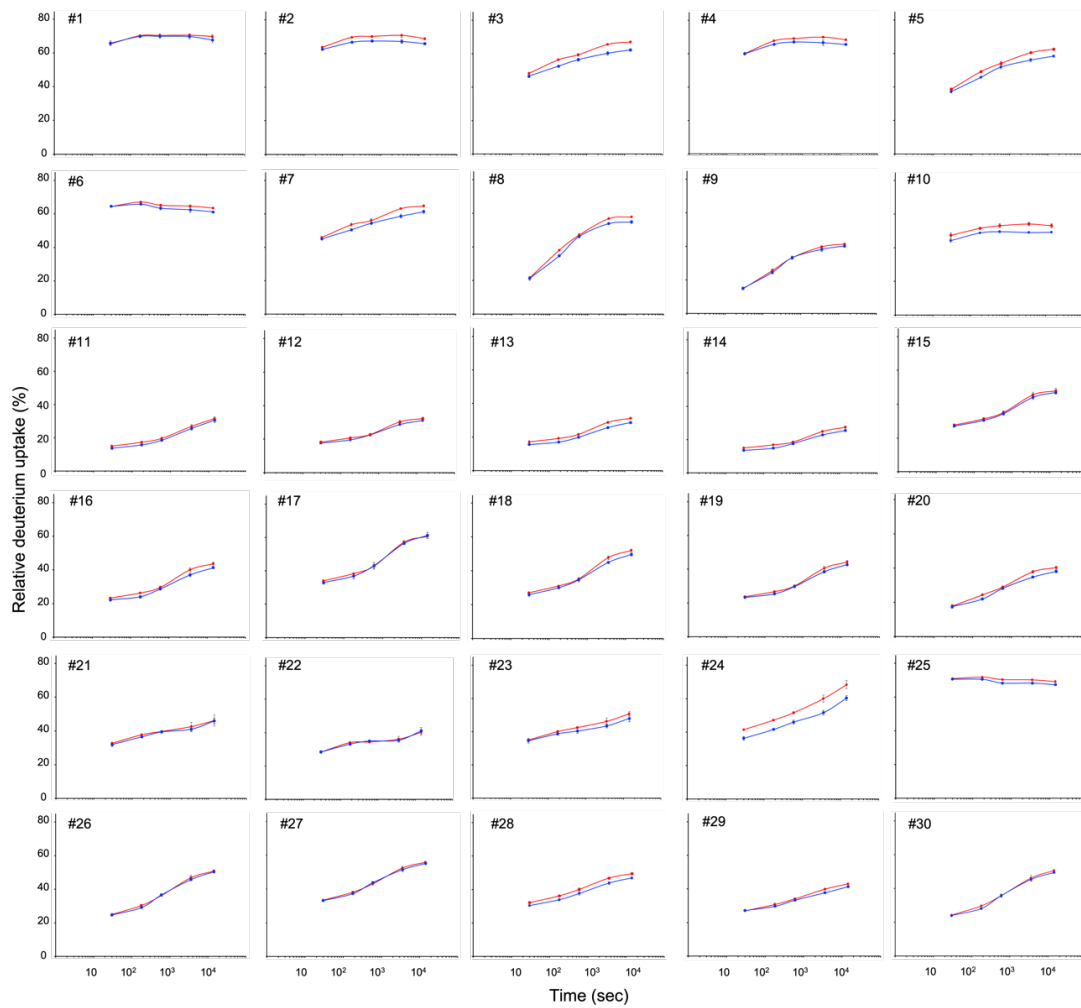

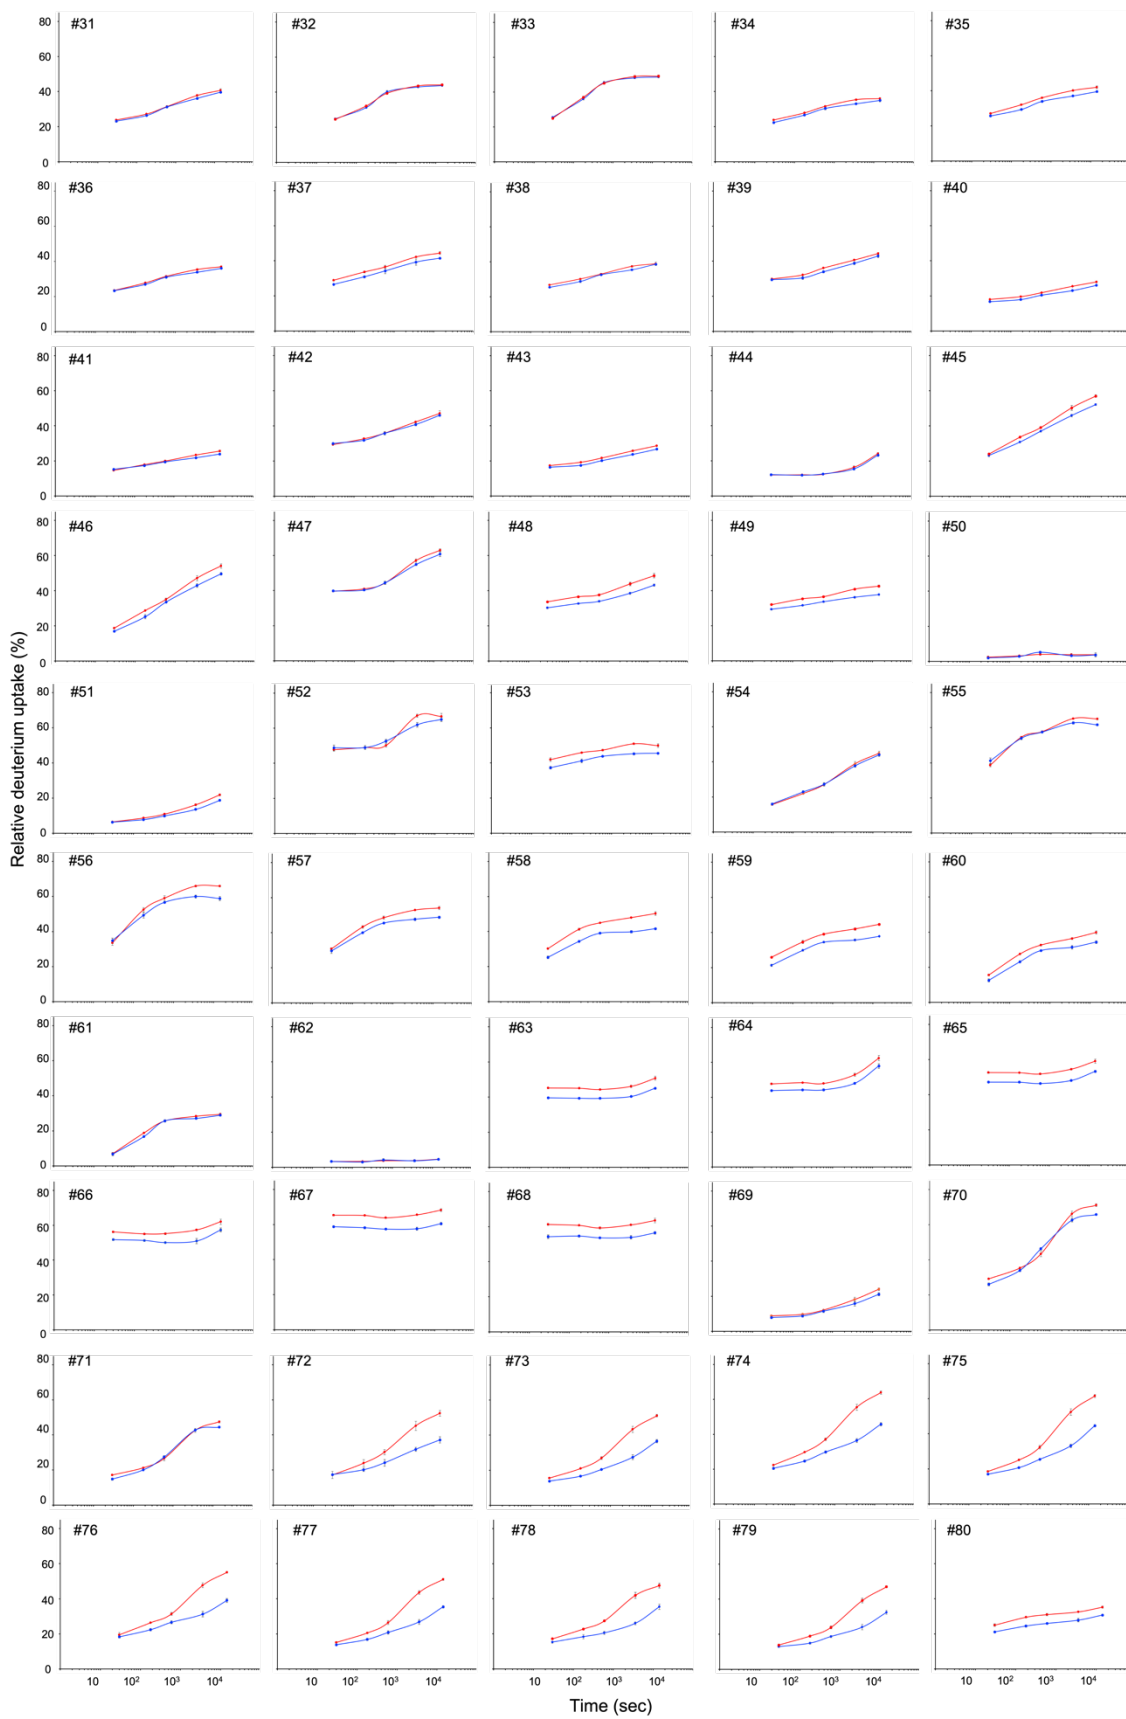

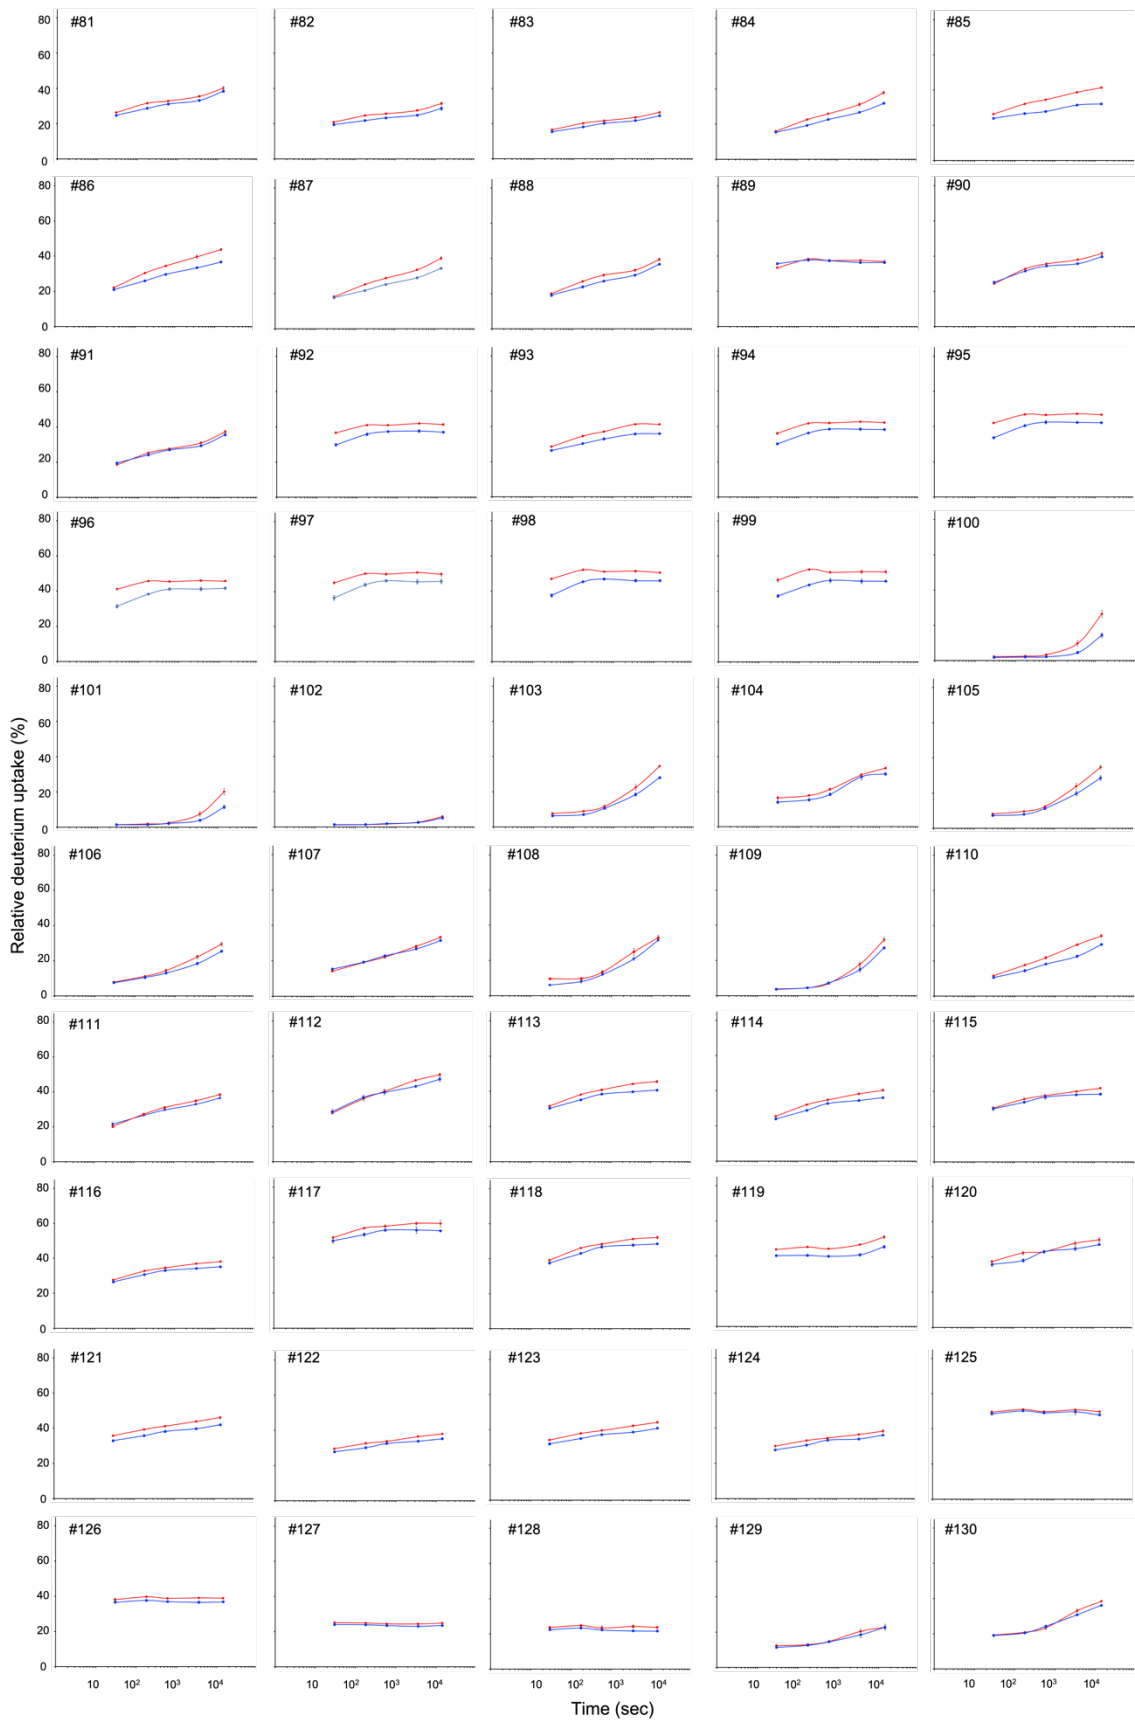



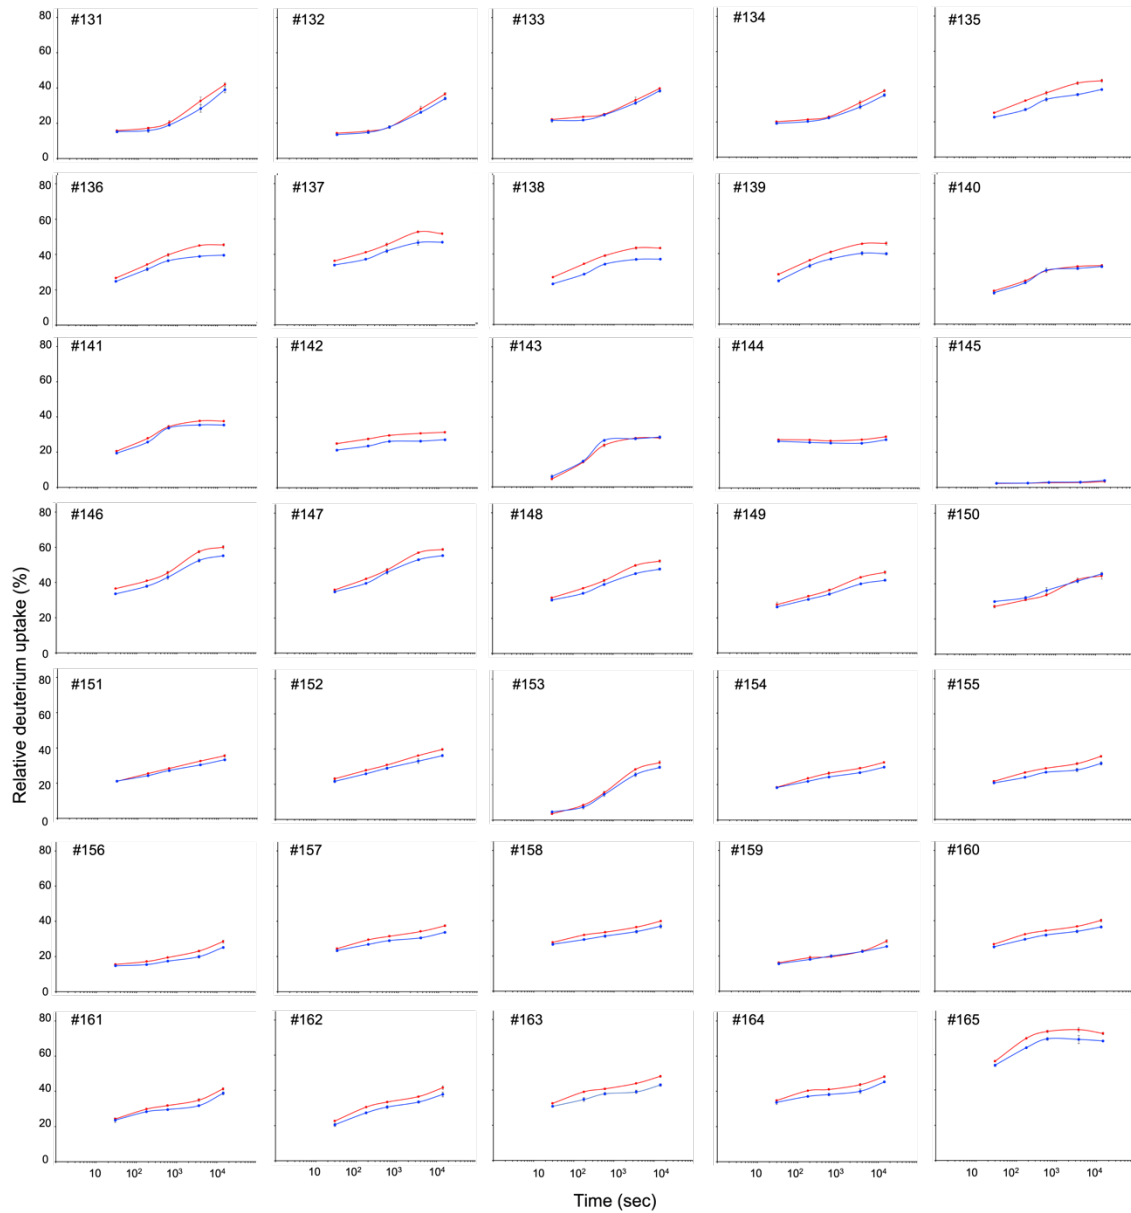

**Supplementary Figure 4**

HDX-MS data of the heavy chain. (a) Coverage map of identified peptides and (b) time-dependent deuterium uptake graphs of all peptides used for deuterium uptake comparison between free (red) and complexed states (blue).

(a)

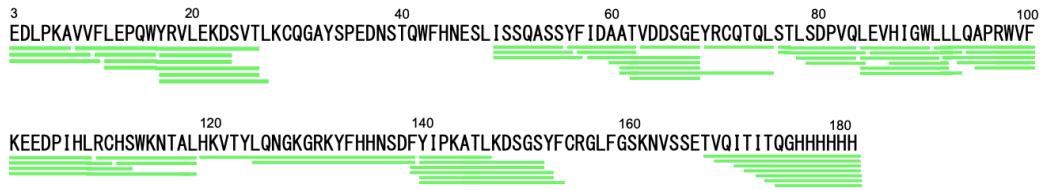

(b)

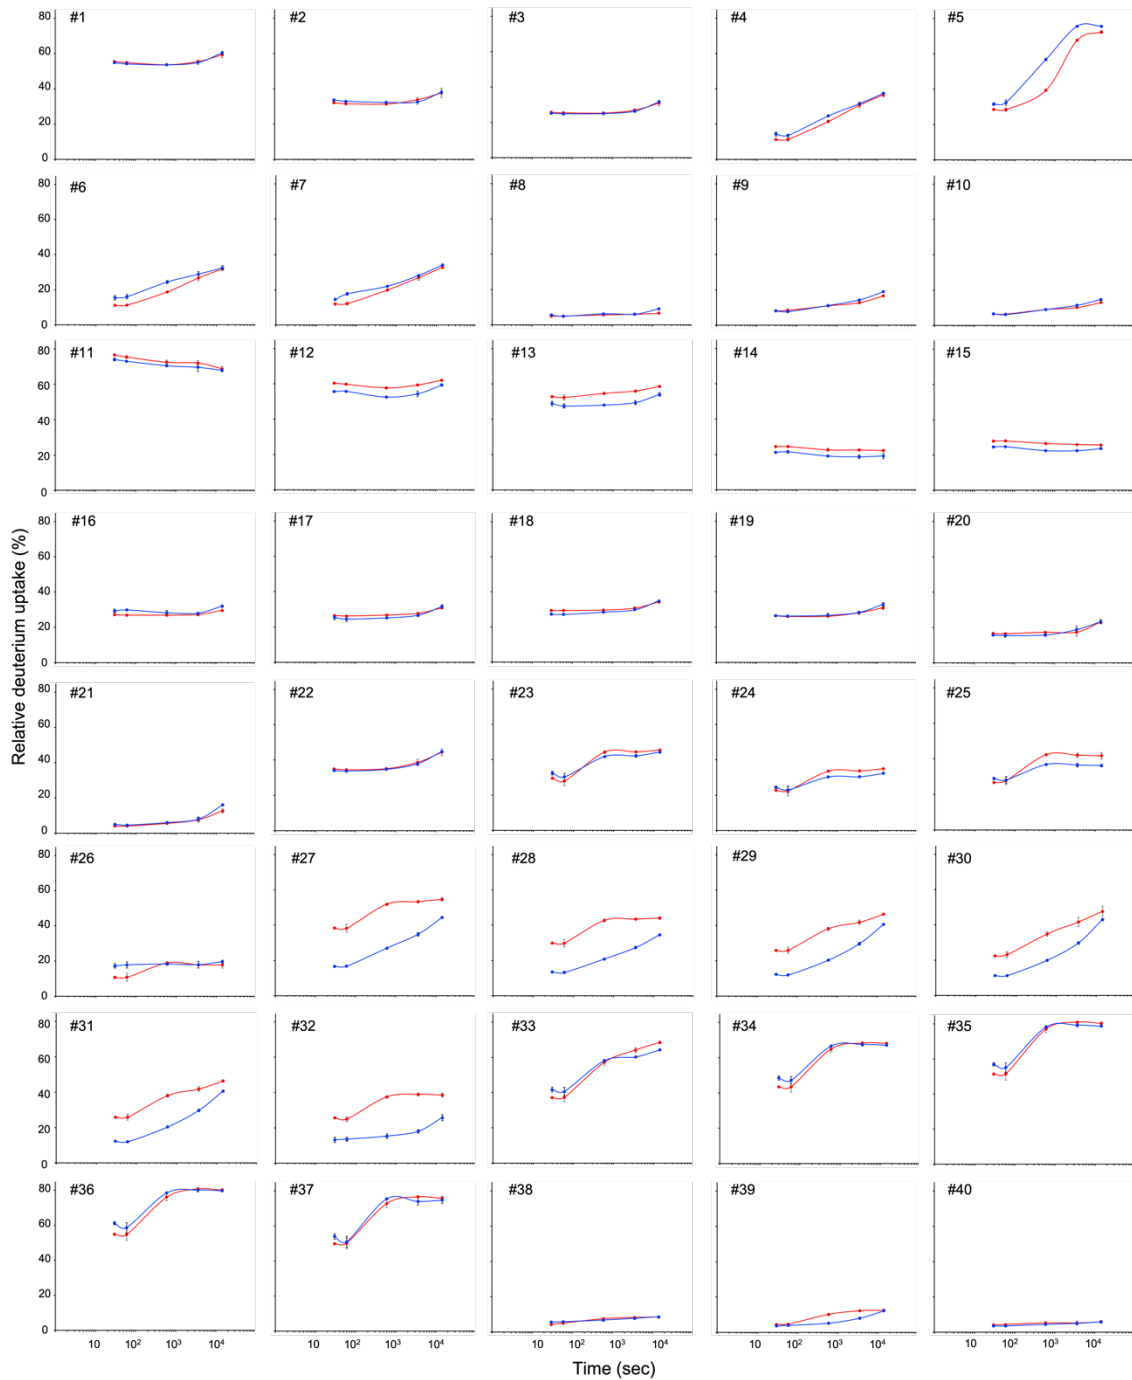

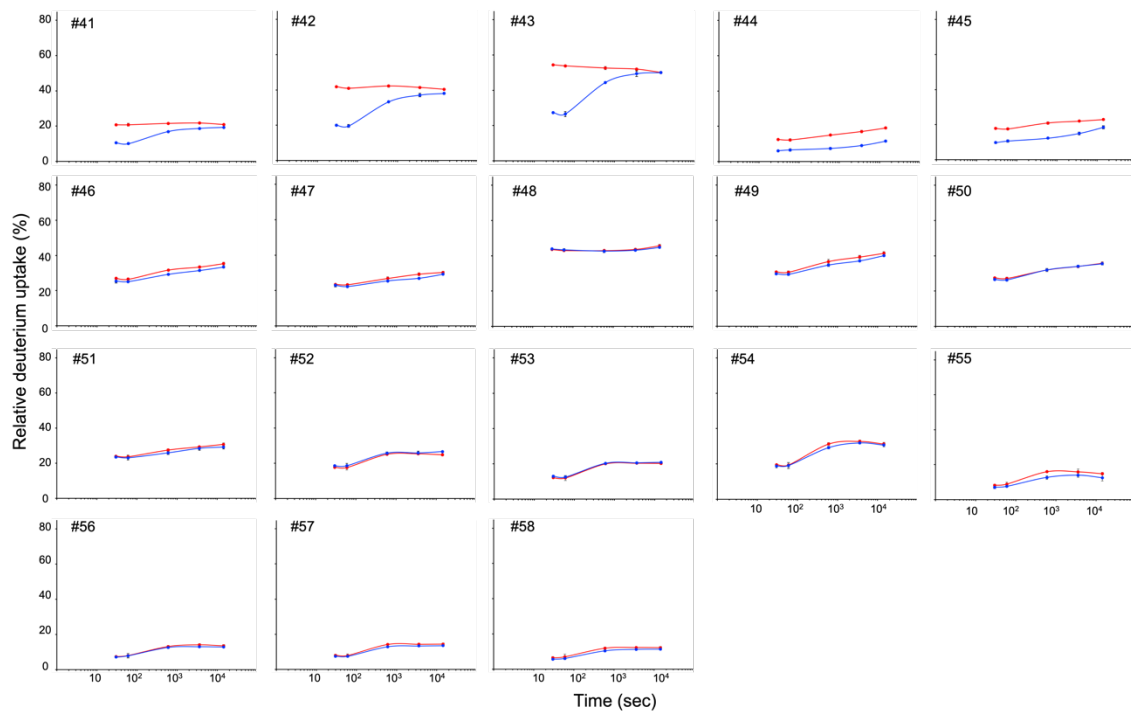

**Supplementary Figure 5**

HDX-MS data of sFc $\gamma$ RIIIa. (a) Coverage map of identified peptides and (b) time-dependent deuterium uptake graphs of all peptides used for deuterium uptake comparison between free (red) and complexed states (blue).

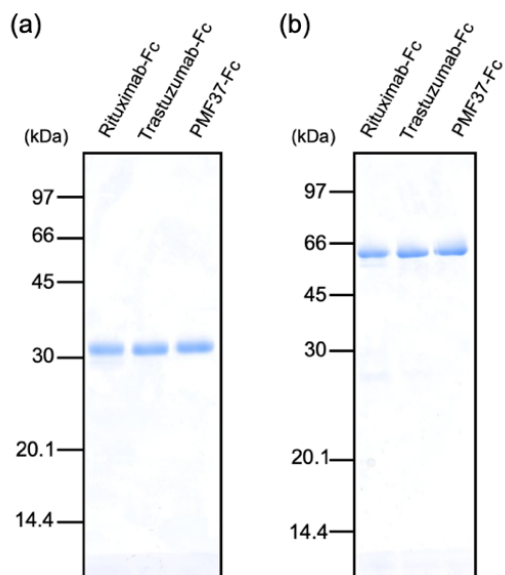

**Supplementary Figure 6**

SDS-PAGE of the Fc preparations under (a) reducing and (b) non-reducing conditions.

(a)

| Peptide number | Sequence | Peptide number | Sequence | Peptide number | Sequence  | Peptide number | Sequence  |
|----------------|----------|----------------|----------|----------------|-----------|----------------|-----------|
| #1             | L4-T20   | #23            | V51-S71  | #45            | V97-L104  | #67            | T163-Y177 |
| #2             | T5-A43   | #24            | V51-L72  | #46            | G99-L104  | #68            | Y177-Q184 |
| #3             | V11-T20  | #25            | V51-T73  | #47            | T105-L117 | #69            | L178-Q184 |
| #4             | V11-A43  | #26            | R61-L72  | #48            | T105-S122 | #70            | L178-S190 |
| #5             | Y30-W35  | #27            | R61-T73  | #49            | T105-E123 | #71            | L178-C193 |
| #6             | V33-M47  | #28            | S63-L72  | #50            | T105-E124 | #72            | L178-Q194 |
| #7             | V33-I48  | #29            | S65-L72  | #51            | T105-L125 | #73            | S179-Q184 |
| #8             | W35-M47  | #30            | L72-L78  | #52            | F118-E123 | #74            | W185-C193 |
| #9             | W35-I48  | #31            | T73-Q79  | #53            | E123-L132 | #75            | W185-Q194 |
| #10            | Y36-M47  | #32            | T73-A80  | #54            | E124-L132 | #76            | W185-T201 |
| #11            | Y36-I48  | #33            | T73-E81  | #55            | Q126-L132 | #77            | W185-E203 |
| #12            | Y36-E50  | #34            | T73-D82  | #56            | A127-L132 | #78            | V195-E203 |
| #13            | Y36-L72  | #35            | T73-E83  | #57            | I136-T145 | #79            | V202-A207 |
| #14            | Q37-M47  | #36            | T73-D85  | #58            | Y140-T145 | #80            | V202-S212 |
| #15            | Q37-I48  | #37            | I74-E81  | #59            | V146-A157 | #81            | K204-E210 |
| #16            | I48-L72  | #38            | I74-D82  | #60            | V146-E160 |                |           |
| #17            | I48-T73  | #39            | I74-D85  | #61            | V146-S176 |                |           |
| #18            | Y49-N60  | #40            | Q79-D85  | #62            | V146-L178 |                |           |
| #19            | Y49-L72  | #41            | Q79-Y86  | #63            | W148-Y177 |                |           |
| #20            | Y49-T73  | #42            | Y95-L104 | #64            | P154-E160 |                |           |
| #21            | Y49-I74  | #43            | T95-L104 | #65            | G158-Y177 |                |           |
| #22            | E50-L72  | #44            | V96-L104 | #66            | T161-Y177 |                |           |

(b)

| Peptide number | Sequence | Peptide number | Sequence  | Peptide number | Sequence  | Peptide number | Sequence  | Peptide number | Sequence  |
|----------------|----------|----------------|-----------|----------------|-----------|----------------|-----------|----------------|-----------|
| #1             | M2-A9    | #35            | R66-M80   | #69            | Y198-T209 | #103           | L306-E318 | #137           | W381-N390 |
| #2             | M2-E10   | #36            | R66-L82   | #70            | L235-V240 | #104           | T307-W313 | #138           | W381-L398 |
| #3             | M2-S17   | #37            | T70-M80   | #71            | L235-F241 | #105           | T307-E318 | #139           | E382-L398 |
| #4             | Q3-E10   | #38            | T70-L82   | #72            | F241-L251 | #106           | T307-E333 | #140           | N389-L398 |
| #5             | Q3-T19   | #39            | A71-M80   | #73            | F241-M252 | #107           | T307-V348 | #141           | Y391-L398 |
| #6             | V4-E10   | #40            | A71-L82   | #74            | L242-L251 | #108           | L309-E318 | #142           | Y391-F404 |
| #7             | V4-S17   | #41            | A71-A100  | #75            | L242-M252 | #109           | H310-E318 | #143           | K392-L398 |
| #8             | V11-T19  | #42            | D72-M80   | #76            | F243-L251 | #110           | Y319-E333 | #144           | D399-F404 |
| #9             | V11-C22  | #43            | D72-L82   | #77            | F243-M252 | #111           | Y319-V348 | #145           | F405-L410 |
| #10            | V20-Y32  | #44            | R83-V89   | #78            | P244-L251 | #112           | K326-V348 | #146           | T411-G420 |
| #11            | Y32-L45  | #45            | D100-L108 | #79            | P244-M252 | #113           | K334-V348 | #147           | T411-V422 |
| #12            | A33-G44  | #46            | R100-L108 | #80            | M252-C261 | #114           | K334-L358 | #148           | T411-F423 |
| #13            | A33-L45  | #47            | V109-A118 | #81            | I253-T260 | #115           | K334-S364 | #149           | T411-C425 |
| #14            | A33-E46  | #48            | V109-F126 | #82            | I253-C261 | #116           | K334-L365 | #150           | K414-F423 |
| #15            | W36-G44  | #49            | V109-L142 | #83            | I253-V262 | #117           | T335-V348 | #151           | S424-G446 |
| #16            | W36-L45  | #50            | V109-T155 | #84            | V262-W277 | #118           | I336-V348 | #152           | S426-G446 |
| #17            | V37-G44  | #51            | S119-N159 | #85            | V263-V273 | #119           | Y349-D356 | #153           | V427-L432 |
| #18            | V37-L45  | #52            | P127-S132 | #86            | V263-F275 | #120           | Y349-N361 | #154           | V427-G446 |
| #19            | V37-E46  | #53            | P127-L142 | #87            | V263-W277 | #121           | Y349-S364 | #155           | M428-G446 |
| #20            | V37-M48  | #54            | V146-W158 | #88            | D265-W277 | #122           | Y349-T366 | #156           | H429-L441 |
| #21            | E46-N62  | #55            | V156-A162 | #89            | V266-V273 | #123           | P352-S364 | #157           | H429-G446 |
| #22            | W47-L53  | #56            | V156-L163 | #90            | V266-F275 | #124           | P352-L365 | #158           | H429-K447 |
| #23            | W47-N62  | #57            | V156-L174 | #91            | V266-W277 | #125           | E357-S364 | #159           | A431-L443 |
| #24            | F54-N62  | #58            | N159-L174 | #92            | N276-T299 | #126           | E357-L365 | #160           | A431-G446 |
| #25            | S60-G65  | #59            | A162-L174 | #93            | Y278-E283 | #127           | T359-L365 | #161           | H433-S444 |
| #26            | F63-T70  | #60            | T164-L174 | #94            | Y278-Y296 | #128           | T359-T366 | #162           | H433-L443 |
| #27            | F63-A71  | #61            | H168-L174 | #95            | Y278-T299 | #129           | T366-D376 | #163           | H433-G446 |
| #28            | F63-M80  | #62            | Y180-V185 | #96            | Y278-Y300 | #130           | V369-D376 | #164           | H433-K447 |
| #29            | F63-L82  | #63            | S183-T197 | #97            | D280-T299 | #131           | V369-I377 | #165           | L441-G446 |
| #30            | Q64-A71  | #64            | V185-L193 | #98            | V282-T299 | #132           | V369-A378 |                |           |
| #31            | Q64-L82  | #65            | V185-T197 | #99            | V282-Y300 | #133           | V369-V379 |                |           |
| #32            | R66-A71  | #66            | V186-L193 | #100           | Y300-V305 | #134           | V369-E380 |                |           |
| #33            | R66-D72  | #67            | V186-T197 | #101           | Y300-L306 | #135           | I377-L398 |                |           |
| #34            | R66-A78  | #68            | P189-T197 | #102           | R301-L306 | #136           | E382-L398 |                |           |

(c)

| Peptide number | Sequence | Peptide number | Sequence  | Peptide number | Sequence  |
|----------------|----------|----------------|-----------|----------------|-----------|
| #1             | E3-A8    | #23            | S76-Q83   | #45            | L124-F139 |
| #2             | E3-V10   | #24            | S76-L84   | #46            | F139-S151 |
| #3             | E3-F11   | #25            | L78-Q83   | #47            | F139-Y152 |
| #4             | V9-T26   | #26            | S79-L84   | #48            | Y140-L146 |
| #5             | F11-W16  | #27            | L84-W90   | #49            | Y140-S151 |
| #6             | L12-D23  | #28            | L84-L91   | #50            | Y140-Y152 |
| #7             | L12-T26  | #29            | L84-L92   | #51            | Y140-F153 |
| #8             | Y17-D23  | #30            | L84-L93   | #52            | T167-H181 |
| #9             | Y17-T26  | #31            | E85-L93   | #53            | V168-H181 |
| #10            | Y17-L27  | #32            | H87-L92   | #54            | I170-H181 |
| #11            | I49-S55  | #33            | L91-F100  | #55            | T171-H181 |
| #12            | I49-Y56  | #34            | L92-F100  | #56            | I172-H181 |
| #13            | I49-F57  | #35            | L93-F100  | #57            | T173-H181 |
| #14            | Y56-T62  | #36            | Q94-F100  | #58            | Q174-H181 |
| #15            | F57-T62  | #37            | A95-F100  |                |           |
| #16            | I58-E68  | #38            | K101-L108 |                |           |
| #17            | A60-E68  | #39            | K101-C110 |                |           |
| #18            | A61-E68  | #40            | K101-S112 |                |           |
| #19            | A61-L75  | #41            | K101-L118 |                |           |
| #20            | T62-E68  | #42            | R109-L118 |                |           |
| #21            | V63-E68  | #43            | H111-L118 |                |           |
| #22            | Y69-L75  | #44            | H119-F139 |                |           |

## Supplementary Table

Peptide identifications in (a) the light chain and (b) the heavy chain of PMF37 and (c) sFcγRIIIa.

### **Supplementary References**

1. Edelman GM, Cunningham BA, Gall WE, Gottlieb PD, Rutishauser U, Waxdal MJ. The covalent structure of an entire gammaG immunoglobulin molecule. *Proc Natl Acad Sci U S A* **63**, 78-85 (1969).
2. Rabat, E. A., Wu, T. T., Reid-Miller, M., Perry, . M., & Gottesman, K. S. *Sequences of Proteins of Immu- nological Interest*, 4th ed., U.S. Department of Health and Human Services, National Institutes of Health, Washington, DC. (1987)
